# Supplementary material
Source: HighWire-hosted journal article supplement (https://www.rcpjournals.org/highwire/filestream/11172/field_highwire_adjunct_files/1/S2_Online_patient_COVID-19_risk_stratification_form.pdf)
Supplement: S2_Online_patient_COVID-19_risk_stratification_form.pdf [file S2_Online_patient_COVID-19_risk_stratification_form.pdf]

## S2. Online patient COVID-19 risk stratification form

| Flow Chart Outcome                                                                                                                                                                                                                                                                                                                                                                                                                                                        |                                    |                          |
|---------------------------------------------------------------------------------------------------------------------------------------------------------------------------------------------------------------------------------------------------------------------------------------------------------------------------------------------------------------------------------------------------------------------------------------------------------------------------|------------------------------------|--------------------------|
| 1. From your scoring on Sections 1-3 in the letter we recently sent you, in relation to COVID-19, which risk category did you identify yourself as?                                                                                                                                                                                                                                                                                                                       | SHIELDING -                        | Strict Social Distancing |
| 2. Please provide an email address or telephone number in case we need to contact you (optional)                                                                                                                                                                                                                                                                                                                                                                          | Please enter your comments here... |                          |
| Do you have any of the following conditions?                                                                                                                                                                                                                                                                                                                                                                                                                              |                                    |                          |
| 3. Inflammatory arthritis, this includes: • Rheumatoid arthritis • Psoriatic arthritis • Seronegative spondyloarthropathy • Axial spondyloarthropathy • Enteropathic arthritis • Ankylosing Spondylitis • Juvenile onset inflammatory arthritis • Adult onset stills disease • Juvenile onset stills disease • Inflammatory polyarthritis • Inflammatory oligoarthritis • Seronegative inflammatory arthritis                                                             | Yes                                | No                       |
| 4. Connective tissue disease, this includes: • Systemic lupus erythematosus (SLE or lupus) • Systemic sclerosis/scleroderma/CREST • Sjogrens syndrome • Mixed connective tissue disease • Myositis • Polymyositis • Dermatomyositis • Anti-synthetase syndrome • Undifferentiated connective tissue disease • Connective tissue disease overlap                                                                                                                           | Yes                                | No                       |
| 5. Vasculitis including: • ANCA associated vasculitis • Granulomatous polyangiitis (GPA) • Eosinophilic granulomatous polyangiitis (eGPA) • Microscopic polyangiitis (MPA) • Wegeners granulomatosis • Churg strauss • Aortitis • Takayasu's arteritis • Giant cell arteritis/temporal arteritis • IgA vasculitis • Hypocomplementaemic urticarial vasculitis • Polyarteritis nodosa • Cryoglobulinaemia • Behcet's disease • Cogan's syndrome • ANCA negative vasculitis | Yes                                | No                       |

6. **Auto-inflammatory syndromes including:** • Familial Mediterranean fever • Tumour necrosis factor receptor associated periodic fever syndrome (TRAPS) • Deficiency of the Interleukin-1 Receptor Antagonist (DIRA) • Neonatal Onset Multisystem Inflammatory Disease (NOMID) • Chronic Atypical Neutrophilic Dermatitis With Lipodystrophy and Elevated Temperature (CANDLE) • Cryopyrin-associated periodic syndrome (CAPS)

Yes

No

7. **Other conditions:** • Relapsing polychondritis • IGG4 disease • Sarcoidosis • Polymyalgia rheumatica • Severe osteogenesis (previously types III/IV) imperfecta • Fibrodysplasia ossificans progressiva • Severe kyphosis/scoliosis from rare bone diseases, e.g. hypophosphatasia, Type 1 osteogenesis imperfecta (OI), Hadju Cheney

Yes

No

#### Risk Assessment

8. Do you currently take prednisolone dose 20mg or higher a day and have been on it for more than 4 weeks

Yes

No

9. Do you currently take Prednisolone dose 5mg or more but less than 20mg a day and have been on this for more than 4 weeks?

Yes

No

10. Have you had cyclophosphamide treatment (tablet or drip) within the last 6 months?

Yes

No

11. Do you take any of these medications:-  
**Immunosuppressive medications include:** Azathioprine, Leflunomide, Methotrexate, Mycophenolate (Mycophenolate Mofetil or Mycopholic Acid), Ciclosporin, Tacrolimus, Sirolimus. It does NOT include Hydroxychloroquine or Sulfasalazine, either alone or in combination.

one of these medications

two or more of these medications

N/A

**Biologic/monoclonal medication include:** Rituximab (within the last 12 months); all anti-TNF drugs – Etanercept (Enbrel/Benepali), Adalimumab (Humira/Imraldi/Amgivita), Infliximab (Remsima/Remicade), Golimumab (Simponi), Certolizumab (Cimzia); Tocilizumab; Abatacept; Belimumab; Anakinra; Secukinumab; Ixekizumab; Ustekinumab; Sarilumumab; Canakinumab. **Small molecule medications include:** JAK inhibitors (Baracitinib and Tofacitinib)

12. Do you have any of the these conditions? Connective tissue diseases Vasculitis, Auto-inflammatory syndromes, Other conditions: • Relapsing polychondritis, • IGG4 disease, • Adult onset Stills disease, • Severe osteogenesis (previously types III/IV) imperfect, • Fibrodysplasia ossificans progressive, • Severe kyphosis/scoliosis from rare bone diseases, e.g. hypophosphatasia, Type 1 osteogenesis imperfects (OI), Hadju Cheney

Yes

No

See Information box below

13. Have you been diagnosed with interstitial lung disease (ILD), pulmonary fibrosis, lung fibrosis or pulmonary hypertension?

Yes

No

14. Are you over 69 years old or have any of the following conditions? Diabetes Lung disease Kidney impairment/disease Ischaemic heart disease e.g. heart attack, angina, heart bypass or heart stents High blood pressure

Yes

No

15. Hydroxychloroquine, sulfasalazine (alone or in combination)

Yes

No

Complete Survey

## Information

**Connective tissue diseases** (systemic lupus erythematosus [SLE or lupus], Systemic sclerosis/scleroderma/CREST, sjogrens syndrome, mixed connective tissue disease, myositis, polymyositis, dermatomyositis, Anti-synthetase syndrome, undifferentiated connective tissue disease, Connective tissue disease overlap) **Vasculitis** (ANCA associated vasculitis [granulomatous polyangitis, eosinophilic granulomatous polyangitis, microscopic polyangiitis, wegeners granulomatosis, churg strauss], takayasu's arteritis, giant cell arteritis, polyarteritis nodosa, IgA vasculitis, Hypocomplementaemic urticarial, vasculitis, Polyarteritis nodosa, Cryoglobulinaemia, Behcet's disease, Cogan's syndrome) **Auto-inflammatory syndromes** (Familial Mediterranean fever, Tumour necrosis, factor receptor associated periodic fever syndrome [TRAPS], Deficiency of the Interleukin-1 Receptor Antagonist [DIRA], Neonatal Onset Multisystem Inflammatory Disease [NOMID], Chronic Atypical Neutrophilic Dermatitis With Lipodystrophy and Elevated Temperature [CANDLE], Cryopyrin-associated periodic syndrome [CAPS])
